# Supplementary material for: Polydimethylsiloxane-based superhydrophobic membranes: fabrication, durability, repairability, and applications
Source: Royal Society of Chemistry journal article supplement (doi:10.1039/c9py01861a), 2020-01-01
Supplement: c9py01861a1.pdf [file c9py01861a1.pdf]

## **Supporting Information**

### **Polydimethylsiloxane-based superhydrophobic membranes: fabrication, durability, repairability, and application**

Maolin Liu, Yuanfang Luo,\* and Demin Jia

College of Materials Science and Engineering, South China University of Technology,  
Guangzhou 510640, People's Republic of China

\*Corresponding Author

E-mail: [psyfluo@163.com](mailto:psyfluo@163.com)

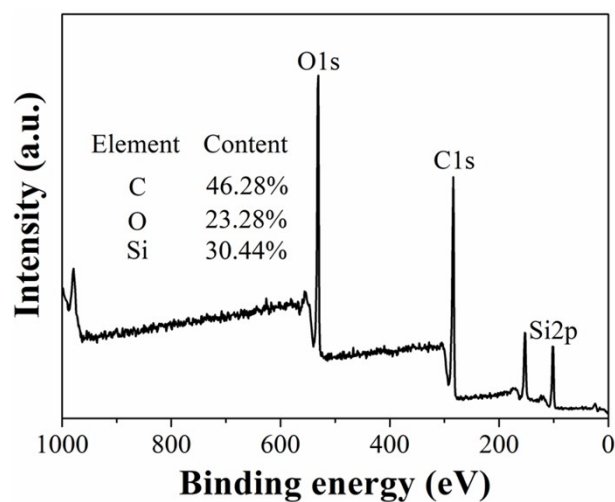

**Fig. S1.** XPS spectrum of the superhydrophobic membrane.

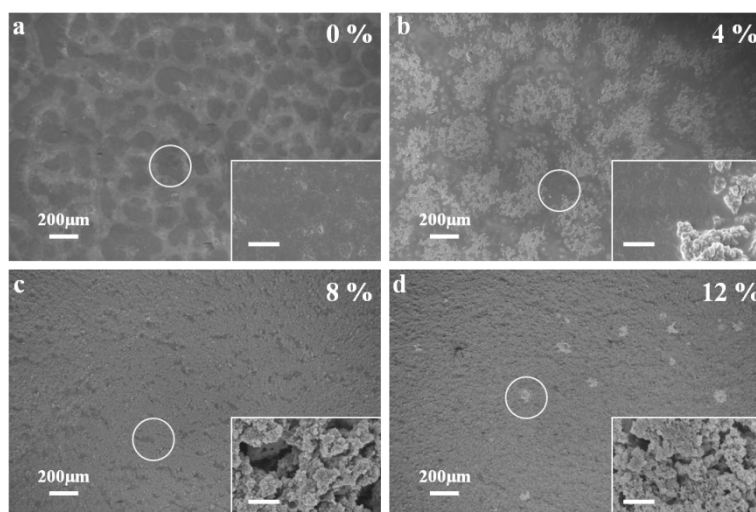

**Fig. S2.** SEM images of the fabricated membranes with different mass fractions of silica: (a) 0%, (b) 4%, (c) 8% and (d) 12%. Insets were high-magnification SEM images and the scale bars were 2 $\mu$ m.

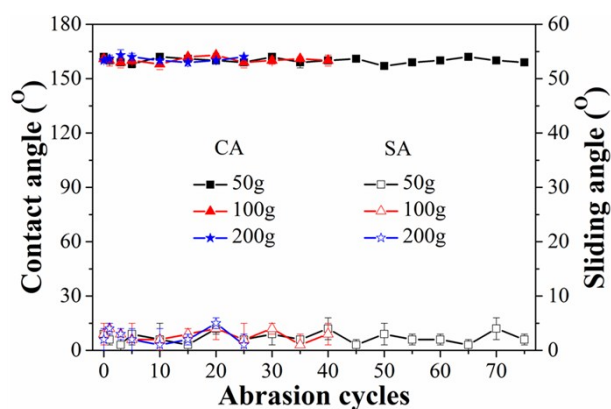

**Fig. S3.** CAs and SAs of the superhydrophobic membranes with different abrasion cycles (Black: 50 g; Red: 100 g; Blue: 200 g).

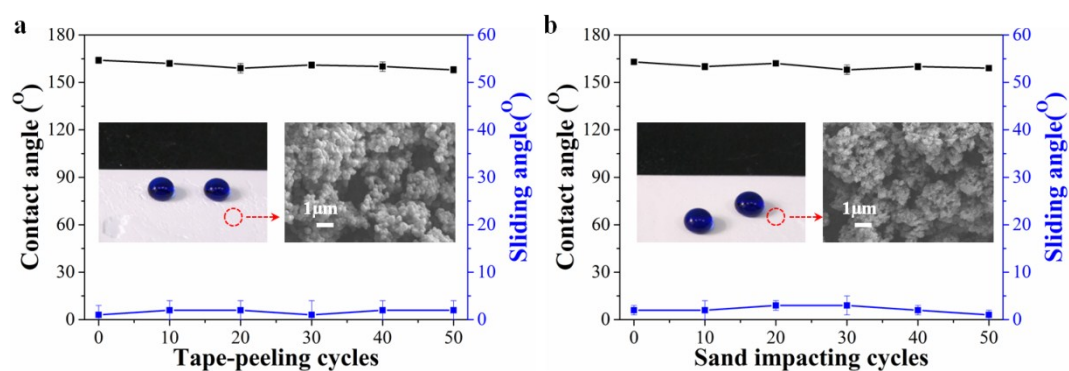

**Fig. S4.** CAs and SAs of the superhydrophobic membrane with (a) tape-peeling cycles and (b) sand impacting cycles. Insets were optical images and SEM images after tests.

**Table S1.** Elemental contents of the original, etched and repairable superhydrophobic membranes

|            | C/%   | O/%   | Si/%  | C/O  |
|------------|-------|-------|-------|------|
| Original   | 46.28 | 23.28 | 30.44 | 1.99 |
| Etched     | 45.98 | 28.85 | 25.17 | 1.59 |
| Repairable | 46.34 | 24.16 | 29.50 | 1.92 |

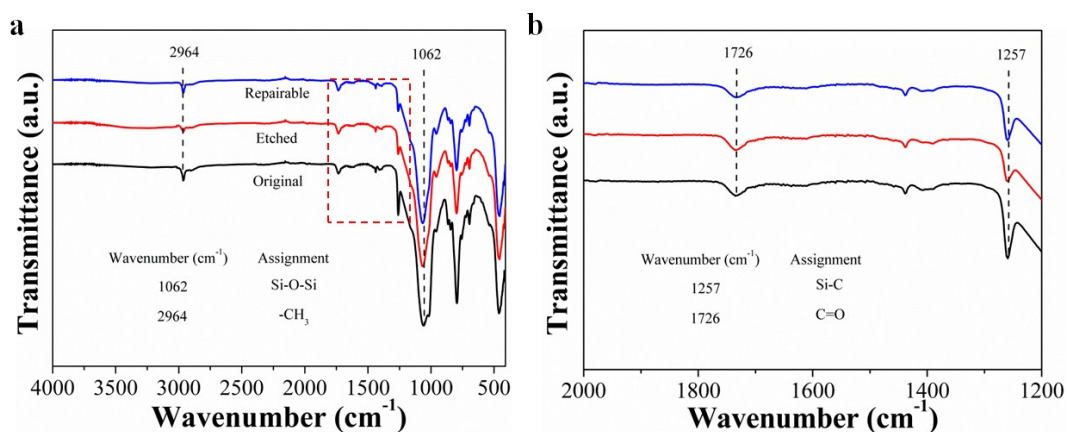

**Fig. S5.** ATR-FTIR spectra of the original, etched and repairable superhydrophobic membranes.

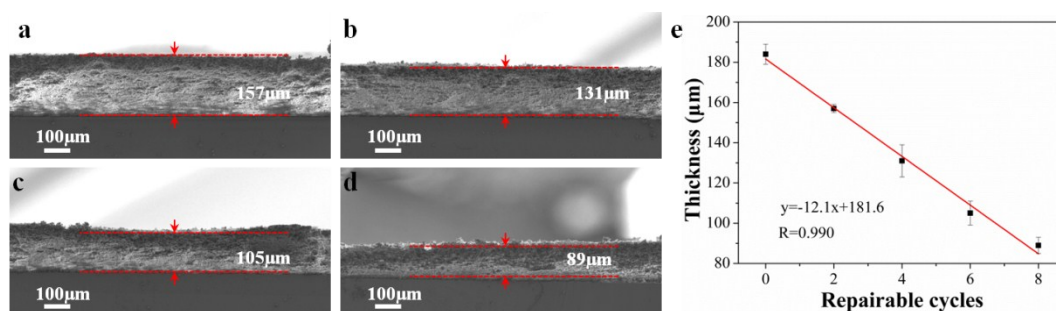

**Fig. S6.** Cross-sectional SEM images of the superhydrophobic membrane with different repairable cycles: (a) 2 cycles, (b) 4 cycles, (c) 6 cycles and (d) 8 cycles. (e) Thickness of the superhydrophobic membrane with repairable cycles.

**Video S1.** Water flow bouncing on the superhydrophobic membrane.

**Video S2.** Underwater pattern display of the superhydrophobic membranes.
